# Supplementary material for: An optimized grapevine RNA isolation procedure and statistical determination of reference genes for real-time RT-PCR during berry development
Source: PubMed Central journal article supplement (PMC1654153; doi:10.1186/1471-2229-6-27), 2006-11-14

# Additional File 1.

Dissociation curves for PCR products amplified with the primer pairs listed in Table 1. NTC: no template control.

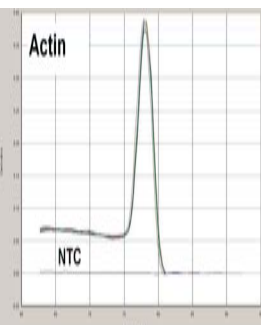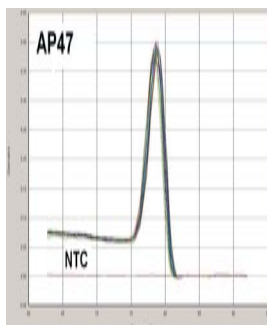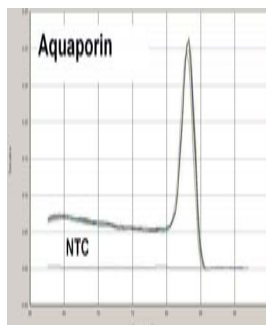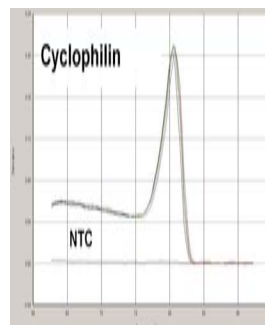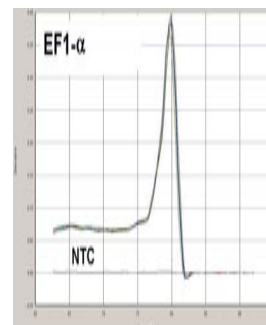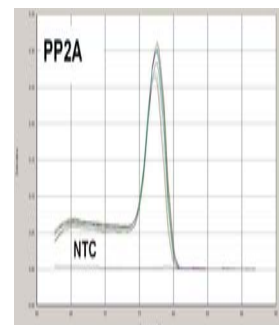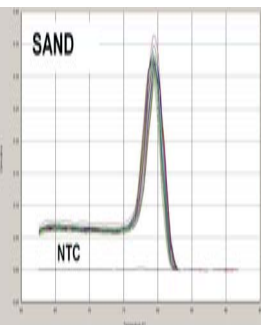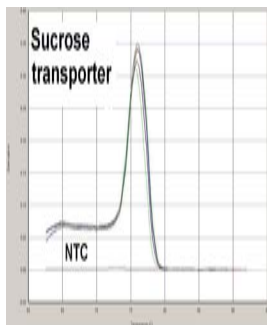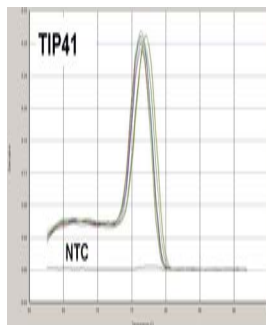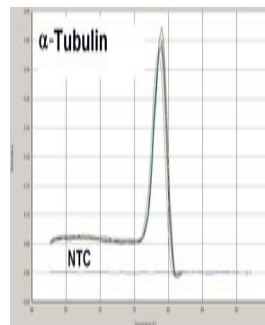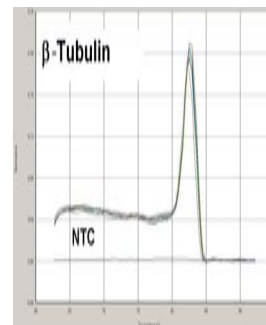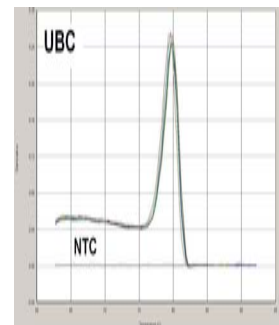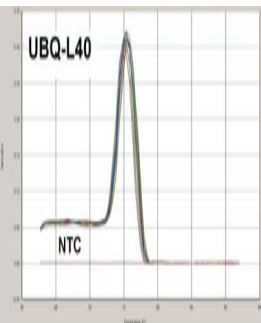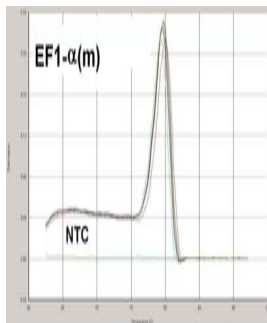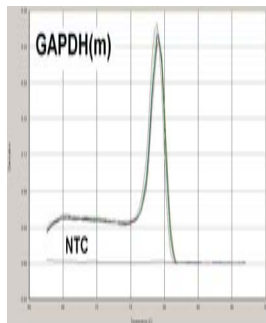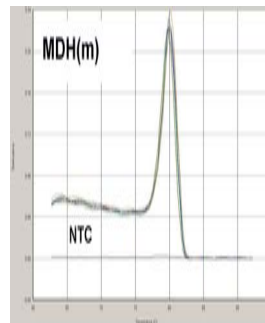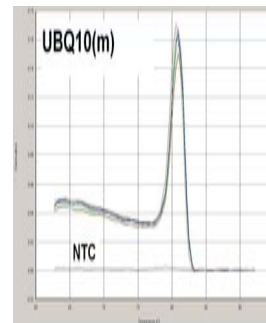

Supplement: 1471-2229-6-27-S1.pdf [file 1471-2229-6-27-S1.pdf]
